# Supplementary material for: Supersensitive all-fabric pressure sensors using printed textile electrode arrays for human motion monitoring and human–machine interaction
Source: Royal Society of Chemistry journal article supplement (doi:10.1039/c8tc02716a), 2018-01-01
Supplement: c8tc02716a1.pdf [file c8tc02716a1.pdf]

## **Supporting Information:**

### **Supersensitive All-Fabric Pressure Sensors Using Printed Textile**

### **Electrode Arrays for Human Motion Monitoring and Human-**

### **Machine Interaction**

Ziqiang Zhou,<sup>a,b</sup> Ying Li,<sup>\*b</sup> Jiang Cheng,<sup>a,b</sup> Shanyong Chen,<sup>b</sup> Rong Hu,<sup>b</sup> Xingwu Yan,<sup>b</sup> Xiaoqing Liao,<sup>b</sup> Canming Xu,<sup>a</sup> Junsheng Yu,<sup>a</sup> and Lu Li<sup>\*b</sup>

<sup>a</sup>State Key Laboratory of Electronic Thin Films and Integrated Devices, School of Optoelectronic Science and Engineering, University of Electronic Science and Technology of China (UESTC), Chengdu 610054, China.

<sup>b</sup>Research Institute for New Materials Technology, Chongqing University of arts and sciences, Chongqing 402160, China.

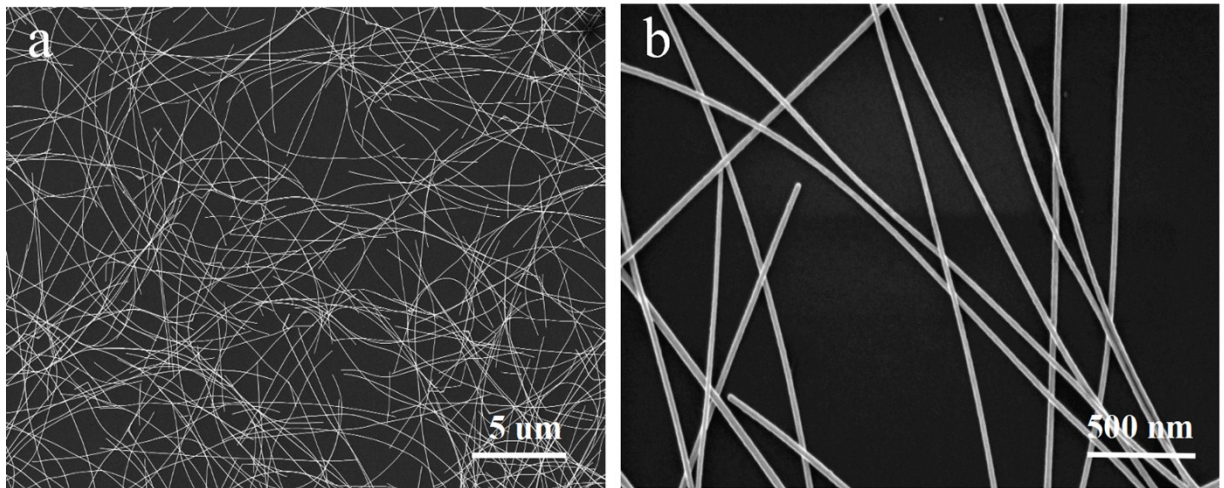

**Fig. S1.** SEM images of AgNWs with different magnifications (a,b).

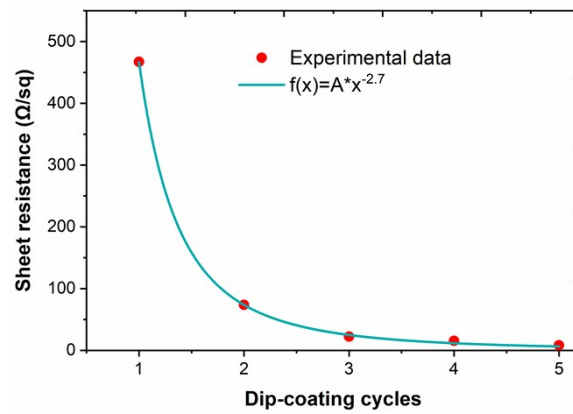

**Fig. S2.** The sheet resistance of AgNWs-decorated cotton with different dip-coating cycles.

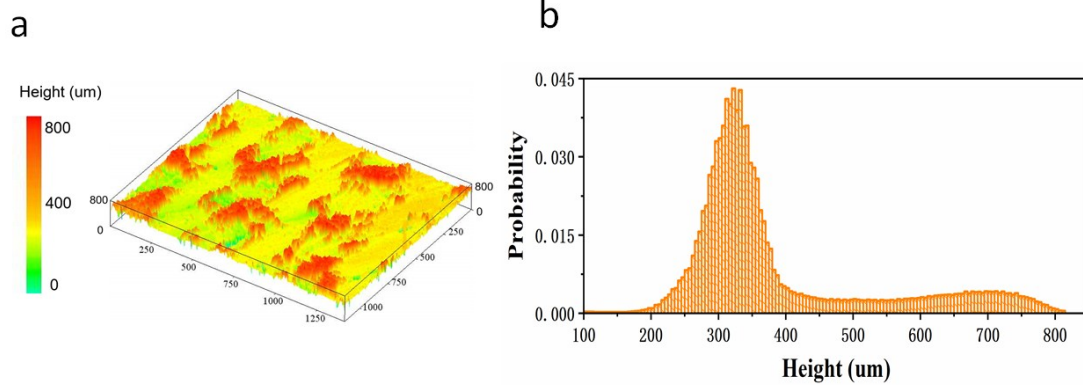

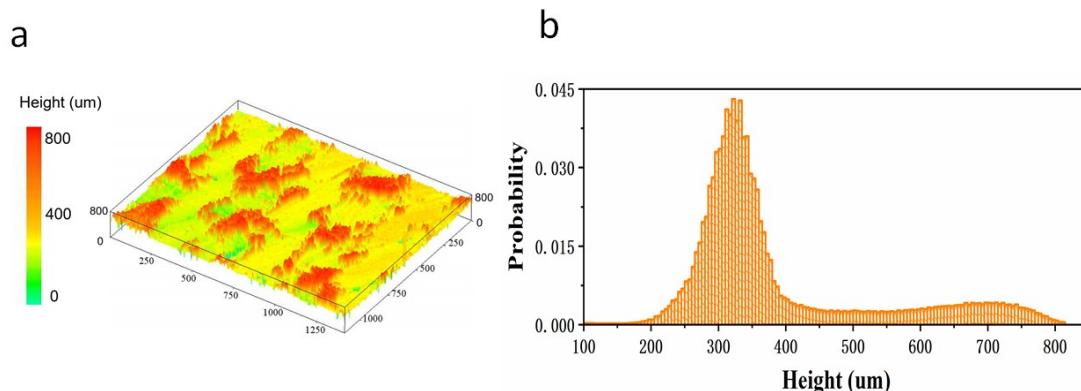

**Fig. S4.** (a) 3D morphology of the AgNWs-coated cotton. (b) The height distribution of the rough surface.

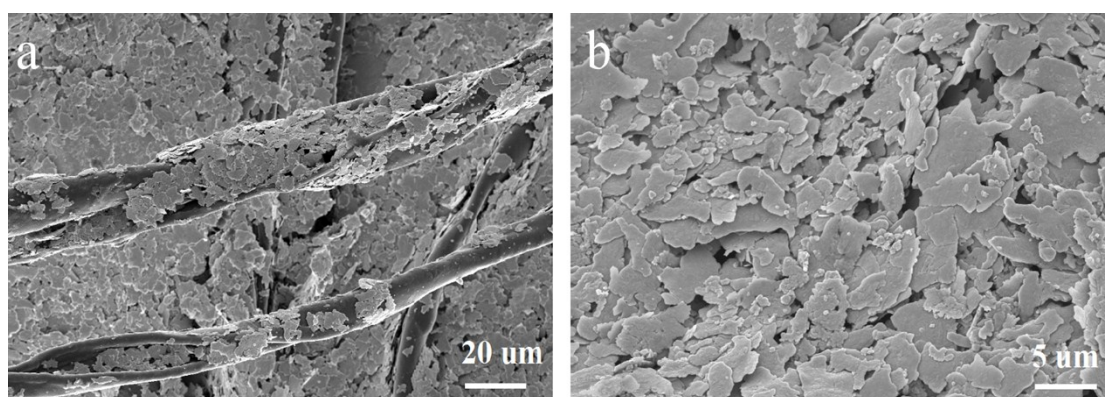

**Fig. S5.** (a, b) SEM images of Ag-coated on cotton substrate with different magnifications.

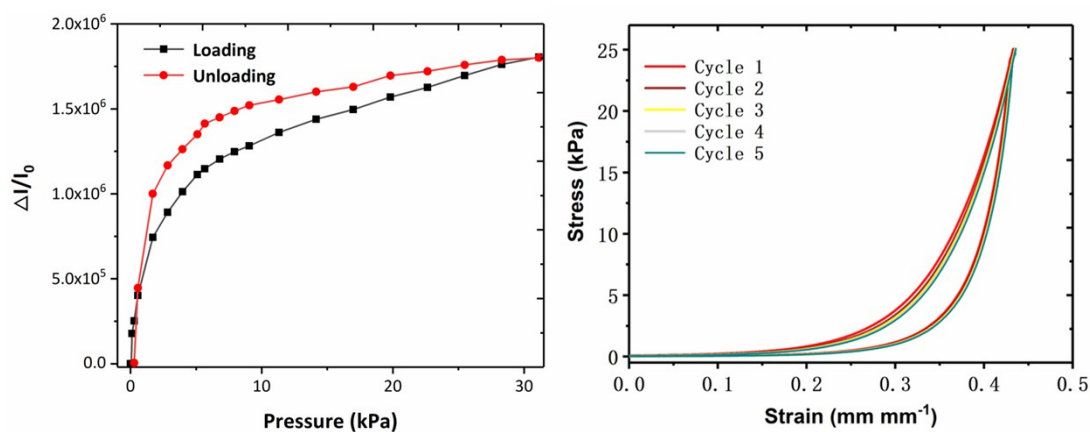

**Fig. S6** (a) Loading-unloading transfer curves of our pressure sensor. (b) Five consecutive compression tests on the AgNWs-coated cotton.

To assess the mechanical properties of the conductive fabric, we measured the compressive stress as a function of strain. An effective elastic modulus ( $E_{\text{eff}}$ ) was defined as the slope of the stress values strain plot, and the AgNWs-decorated cotton showed a very low  $E_{\text{eff}}$  at a low-pressure regime and subsequently increased with compression. The  $E_{\text{eff}}$  at 5 kPa was 85.82 kPa, which is lower than the typical low-modulus elastomer previously reported, such as PDMS and PPy hydrogels (about 200 kPa)<sup>[4]</sup>.

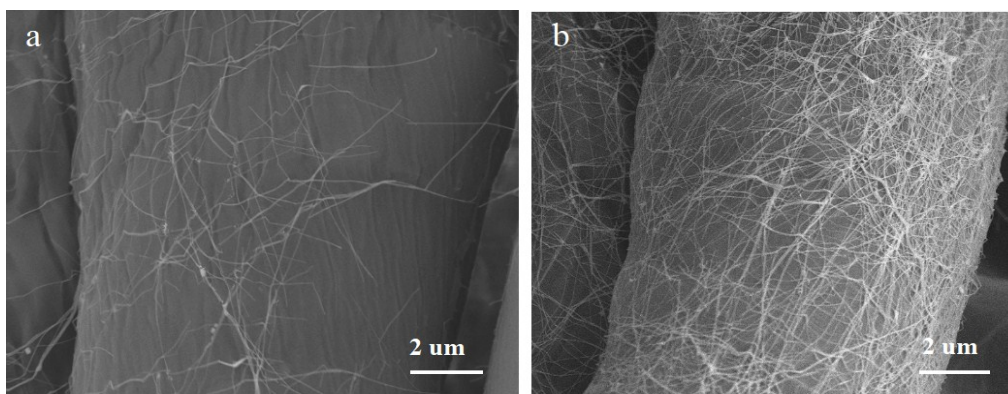

**Fig. S7** (a) SEM of AgNWs-coated fiber with 1 dip-coating cycle. (b) SEM of AgNWs-coated fiber with 5 dip-coating cycles.

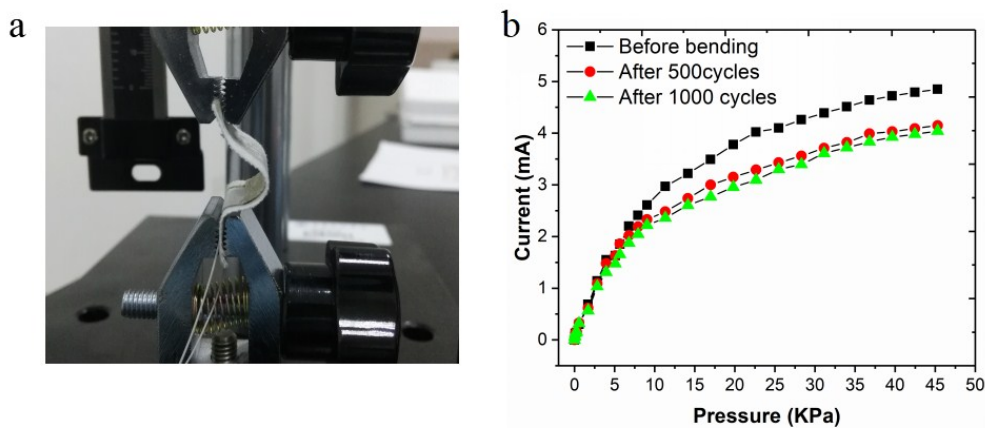

**Fig. S8.** (a) The photograph of the bent device. (b) The performance of the pressure sensor after 1000 bending cycles.

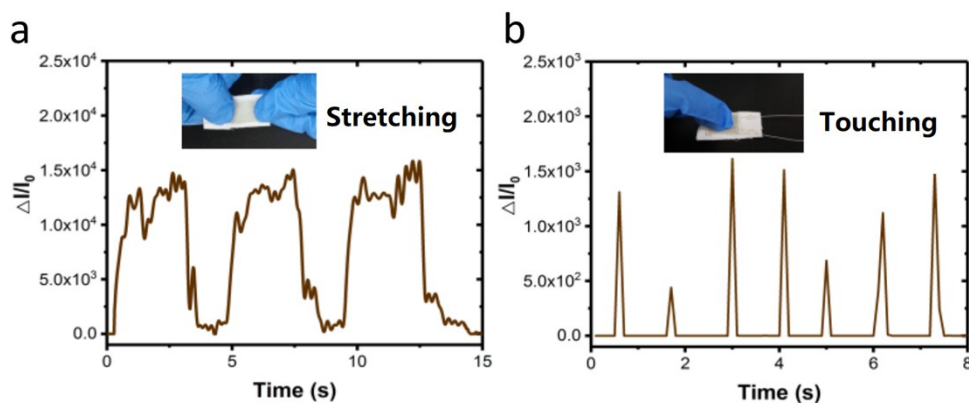

**Fig. S9.** Digital photographs and current signal responding to mechanical stimulus for several loading/unloading cycles: (a) stretching, (b) touching.

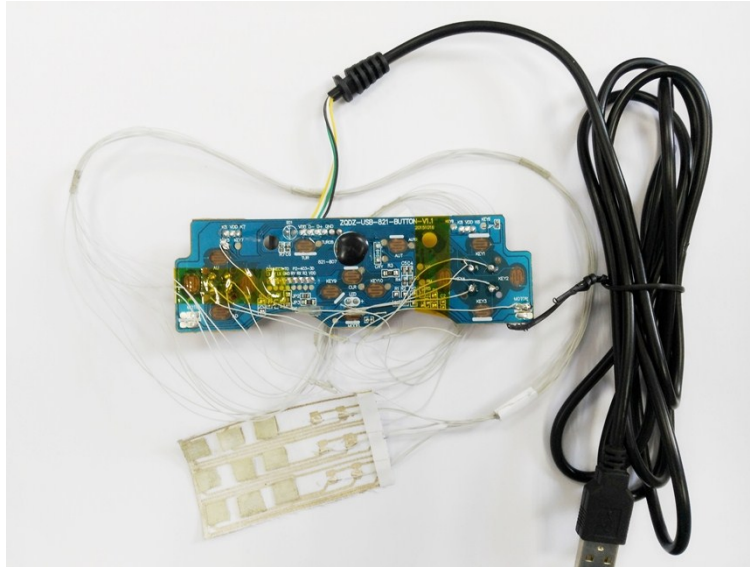

**Fig. S10.** Digital photograph of the hardware of human-computer interactive system.

**Video S1:** Sensing arrays used for human-machine interaction to play the piano.

**Video S2:** Sensing arrays used for human-machine interaction to play computer games.

**Table S1.** Comparison of the sensitivity, detection limit, response time and power assumption of our device with those in the literature.

| Device type      | Materials                      | Switching ratio             | Sensitivity ( kPa <sup>-1</sup> )              | Detection limit | Response/relaxation time ( ms ) | Operating voltage (V) | Ref.             |
|------------------|--------------------------------|-----------------------------|------------------------------------------------|-----------------|---------------------------------|-----------------------|------------------|
| Resistive        | Textile/AgNWs/Silver paste     | ~10 <sup>6</sup><br>(3 kPa) | ~5.65*10 <sup>5</sup>                          | 0.34 Pa         | 6/13                            | 0.1                   | <b>This work</b> |
| Resistive        | Textile/CNTs/Ni                | 100<br>(10 kPa)             | 14.4                                           | 2 Pa            | 18/24                           | <6                    | 1                |
| Resistive        | Textile/AgNWs/rGo              | ~3.4<br>(3 kPa)             | 5.8                                            | 0.125 Pa        | 29.5/15.6                       | -                     | 2                |
| Resistive        | PDMS/AgNWs /Conductive threads | ~10 <sup>7</sup><br>(3 kPa) | 1.04×10 <sup>4</sup> -<br>6.57×10 <sup>6</sup> | 0.6 Pa          | 4/14                            | 0.1                   | 3                |
| Resistive        | PET/PPy hydrogel               | ~10 <sup>3</sup><br>(5 kPa) | <133.1                                         | 0.8 Pa          | 47/-                            | -                     | 4                |
| Resistive        | PI/Carbon-decorated fabric     | ~4<br>(10 kPa)              | 0.585                                          | -               | 4/4                             | -                     | 5                |
| Resistive        | PDMS/AuNWs-coated paper        | ~3.5<br>(3 kPa)             | 1.14                                           | 13 Pa           | 17/-                            | 1.5                   | 6                |
| Resistive        | PDMS/PEDOT:PSS/ PUD            | ~20<br>(4 kPa)              | 10.32                                          | 23 Pa           | 200/-                           | 0.2                   | 7                |
| Resistive        | PU fiber/AgNWs                 | ~1.1<br>(5 kPa)             | 0.12                                           | 10 mg           | 35/15                           | -                     | 8                |
| Resistive        | Cu/PAAM hydrogel               | ~1.5<br>(8 kPa)             | 0.35                                           | 100 Pa          | -                               | -                     | 9                |
| Resistive        | PDMS/SWNTs                     | ~1.3<br>(1 kPa)             | 1.8                                            | 0.6             | <10/-                           | 2                     | 10               |
| Resistive        | Au/PDMS/CNT/ITO/ PET/AgNWs     | ~500<br>(3 kPa)             | 204.4                                          | 0.2             | <70/-                           | -                     | 11               |
| Resistive        | PDMS/ZnO NWs                   | ~5<br>(5 kPa)               | 6.8                                            | 0.6             | <5/-                            | -                     | 12               |
| Capacitance      | Textile fiber/Rubber/ AgNP     | ~1.5<br>(5 kPa)             | 0.210                                          | 8mg             | 40/10                           | 1                     | 13               |
| Capacitance      | PDMS/Ecoflex/CNTs              | ~1.025<br>(10 kPa)          | 0.034-0.05                                     | 0.38 Pa         | 63/-                            | -                     | 14               |
| Capacitance      | PDMS/AgNWs                     | ~2<br>(1 MPa)               | 0.00162                                        | ~2.7 g          | 40/-                            | -                     | 15               |
| Triboelectricity | PET/PDMS/EVA                   | -                           | 0.006                                          | 1000 Pa         | 70/-                            | -                     | 16               |
| Piezoelectricity | PET/ZnO NWs                    | -                           | 0.131                                          | 3500            | 150/-                           | 1                     | 17               |
| Piezoelectricity | Au/ITO/ZnO                     | -                           | 1.64                                           | -               | -                               | 0.2                   | 18               |

## References:

- (1) Liu, M.; Pu, X.; Jiang, C.; Liu, T.; Huang, X.; Chen, L.; Du, C.; Sun, J.; Hu, W.; Wang, Z. L. Large-Area All-Textile Pressure Sensors for Monitoring Human Motion and Physiological Signals. *Adv. Mater.* **2017**, *29*, 1703700.
- (2) Wei, Y.; Chen, S.; Dong, X.; Lin, Y.; Liu, L. Flexible piezoresistive sensors based on “dynamic bridging effect” of silver nanowires toward graphene. *Carbon* **2017**, *113*, 395-403.
- (3) Lai, Y.; Ye, B.; Lu, C.; Chen, C.; Jao, M.; Su, W.; Hung, W.; Lin, T.; Chen, Y. Extraordinarily Sensitive and Low-Voltage Operational Cloth-Based Electronic Skin for Wearable Sensing and Multifunctional Integration Uses: A Tactile-Induced Insulating-to-Conducting Transition. *Adv. Funct. Mater.* **2016**, *26*, 1286-1295.
- (4) Pan, L.; Chortos, A.; Yu, G.; Wang, Y.; Isaacson, S.; Allen, R.; Shi, Y.; Dauskardt, R.; Bao, Z. An ultra-sensitive resistive pressure sensor based on hollow-sphere microstructure induced elasticity in conducting polymer film. *Nat. Commun.* **2014**, *5*, 3002.
- (5) Luo, N.; Dai, W.; Li, C.; Zhou, Z.; Lu, L.; Poon, C. C. Y.; Chen, S.; Zhang, Y.; Zhao, N. Flexible Piezoresistive Sensor Patch Enabling Ultralow Power Cuffless Blood Pressure Measurement. *Adv. Funct. Mater.* **2016**, *26*, 1178-1187.
- (6) Gong, S.; Schwalb, W.; Wang, Y.; Chen, Y.; Tang, Y.; Si, J.; Shirinzadeh, B.; Cheng, W. A wearable and highly sensitive pressure sensor with ultrathin gold nanowires. *Nat. Commun.* **2014**, *5*.
- (7) Choong, C.; Shim, M.; Lee, B.; Jeon, S.; Ko, D.; Kang, T.; Bae, J.; Lee, S. H.; Byun, K.; Im, J.; Jeong, Y. J.; Park, C. E.; Park, J.; Chung, U. Highly Stretchable Resistive Pressure Sensors Using a Conductive Elastomeric Composite on a Micropyramid Array. *Adv. Mater.* **2014**, *26*, 3451-3458.
- (8) Wei, Y.; Chen, S.; Yuan, X.; Wang, P.; Liu, L. Multiscale Wrinkled Microstructures for Piezoresistive Fibers. *Adv. Funct. Mater.* **2016**, *26*, 5078-5085.
- (9) Duan, J.; Liang, X.; Guo, J.; Zhu, K.; Zhang, L. Ultra-Stretchable and Force-Sensitive Hydrogels Reinforced with Chitosan Microspheres Embedded in Polymer Networks. *Adv. Mater.* **2016**, *28*, 8037-8044.
- (10) Wang, X.; Gu, Y.; Xiong, Z.; Cui, Z.; Zhang, T. Silk-Molded Flexible, Ultrasensitive, and Highly Stable Electronic Skin for Monitoring Human Physiological Signals. *Adv. Mater.* **2014**, *26*, 1336-1342.
- (11) Luo, J.; Fan, F. R.; Zhou, T.; Tang, W.; Xue, F.; Wang, Z. L. Ultrasensitive self-powered pressure sensing system. *Extreme Mechanics Letters* **2015**, *2*, 28-36.
- (12) Ha, M.; Lim, S.; Park, J.; Um, D.; Lee, Y.; Ko, H. Bioinspired Interlocked and Hierarchical Design of ZnO Nanowire Arrays for Static and Dynamic Pressure-Sensitive Electronic Skins. *Adv. Funct. Mater.* **2015**, *25*, 2841-2849.
- (13) Lee, J.; Kwon, H.; Seo, J.; Shin, S.; Koo, J. H.; Pang, C.; Son, S.; Kim, J. H.; Jang, Y. H.; Kim, D. E.; Lee, T. Conductive Fiber-Based Ultrasensitive Textile Pressure Sensor for Wearable Electronics. *Adv. Mater.* **2015**, *27*, 2433-2439.
- (14) Kim, S. Y.; Park, S.; Park, H. W.; Park, D. H.; Jeong, Y.; Kim, D. H. Highly Sensitive and Multimodal All-Carbon Skin Sensors Capable of Simultaneously Detecting Tactile and Biological Stimuli. *Adv. Mater.* **2015**, *27*, 4178-4185.
- (15) Yao, S.; Zhu, Y. Wearable multifunctional sensors using printed stretchable conductors made of silver nanowires. *Nanoscale* **2014**, *6*, 2345.
- (16) Wang, X.; Zhang, H.; Dong, L.; Han, X.; Du, W.; Zhai, J.; Pan, C.; Wang, Z. L. Self-Powered

High-Resolution and Pressure-Sensitive Triboelectric Sensor Matrix for Real-Time Tactile Mapping. *Adv. Mater.* **2016**, *28*, 2896-2903.

(17) Wu, W.; Wen, X.; Wang, Z. L. Taxel-Addressable Matrix of Vertical-Nanowire Piezotronic Transistors for Active and Adaptive Tactile Imaging. *Science* **2013**, *340*, 952-957.

(18) Chun, J.; Lee, K. Y.; Kang, C.; Kim, M. W.; Kim, S.; Baik, J. M. Embossed Hollow Hemisphere-Based Piezoelectric Nanogenerator and Highly Responsive Pressure Sensor. *Adv. Funct. Mater.* **2014**, *24*, 2038-2043.
